## Generation of nanobodies acting as silent and positive allosteric modulators of the $\alpha 7$ nicotinic acetylcholine receptor

Qimeng Li<sup>1,2,3,4</sup>, Ákos Nemečz<sup>1\*</sup>, Gabriel Aymé<sup>2\*</sup>, Marie S Prevost<sup>1</sup>, Stéphanie Pons<sup>5</sup>, Gabrielle Dejean de la Bâtie<sup>1</sup>, Nathalie Barilone<sup>1</sup>, Rayen Baachaoui<sup>1,2</sup>, Uwe Maskos<sup>5</sup>, Pierre Lafaye<sup>2</sup>, Pierre-Jean Corringer<sup>1\*</sup>

1 Institut Pasteur, Université Paris Cité, CNRS UMR 3571, Channel-Receptors Unit, Paris, France

2 Institut Pasteur, Université Paris Cité, CNRS UMR 3528, Antibody Engineering platform, Paris, France

3 Lanzhou Institute of Biological Product Co., Lanzhou, China

4 Sorbonne Université, Collège doctoral, Paris, France

5 Institut Pasteur, Université Paris Cité, CNRS UMR 3571, Integrative Neurobiology of Cholinergic Systems Unit, Paris, France

Corresponding authors\*

[akos@umk.pl](mailto:akos@umk.pl)

[gabriel.ayme@pasteur.fr](mailto:gabriel.ayme@pasteur.fr)

[picorin@pasteur.fr](mailto:picorin@pasteur.fr)

### *Acknowledgements*

We thank Sylvie Bay for help in nanobody characterization by mass spectroscopy. The work and QL were supported by a grant from Lanzhou Institute of Biological Products Co., Ltd, Lanzhou, China (Institut Pasteur PPU program and doctoral school ED3C). The work was also supported by the Institut Pasteur “Programme transversal de recherche” (PTR 03-17 Nicobinder). ÁN received funding from the “Agence Nationale de la Recherche” (Grant ANR-17-CE11-0030, Nicofive), GDB received funding from the “Institut National du Cancer” INCa, MP and PJC received funding from the European Research Council (Grant #: 788974, Dynacotine), and finally SP and UM were supported by “Fondation pour la Recherche Médicale” FRM-Equipe, INCa, ERA-NET Neuron, and “Centre National de la Recherche Scientifique”.

## Abstract

The  $\alpha 7$  nicotinic acetylcholine receptor (nAChR), a potential drug target for treating cognitive disorders, mediates communication between neuronal and non-neuronal cells. Although many competitive antagonists, agonists, and partial-agonists have been found and synthesized, they have not led to effective therapeutic treatments. In this context, small molecules acting as positive allosteric modulators binding outside the orthosteric, acetylcholine, site have attracted considerable interest. Two single-domain antibody fragments, C4 and E3, generated through alpaca immunization with cells expressing the extracellular domain of the human  $\alpha 7$ -nAChR, are herein described. They bind to the  $\alpha 7$ -nAChR but not to the other major nAChR subtypes,  $\alpha 4\beta 2$  and  $\alpha 3\beta 4$ . E3 acts as a slowly associating type I positive allosteric modulator, strongly potentiating the acetylcholine-elicited currents, while not significantly altering the desensitization of the receptor. An E3-E3 bivalent construct shows similar potentiating properties but displays very slow dissociation kinetics conferring quasi-irreversible properties. Whereas, C4 does not alter the receptor function, but fully inhibits the E3-evoked potentiation, showing it is a silent allosteric modulator competing with E3 binding. Both nanobodies do not compete with  $\alpha$ -bungarotoxin, localizing at an allosteric extracellular binding site away from the orthosteric site. The functional differences of each nanobody, as well as the alteration of functional properties through nanobody modifications indicate the importance of this extracellular site. The nanobodies will be useful for pharmacological and structural investigations; moreover, they, along with the extracellular site, have a direct potential for clinical applications.

**Keywords:**  $\alpha 7$ -nAChR, nicotinic acetylcholine receptor, VHH, nanobody, allosteric modulator

## Introduction

Nicotinic acetylcholine receptors (nAChRs) belong to the pentameric ligand-gated ion channel family and play a key role in neuronal communication as well as in non-neuronal cells such as immune and epithelial cells. The major nAChRs in the brain and at the periphery are the homomeric  $\alpha 7$ -nAChR, and the heteromeric  $\alpha 4\beta 2$ - and  $\alpha 3\beta 4$ -nAChRs, a fraction of these later incorporating the accessory  $\alpha 5$  or  $\beta 3$  subunits [1]. Acetylcholine (ACh) binding promotes a global reorganization in nAChRs, whereupon their intrinsic channel opens, while the prolonged binding of ACh promotes a second reorganization, where the channel closes in what is termed the desensitized state. Among nAChRs,  $\alpha 7$ -nAChR displays unique properties, including a low probability of channel opening and rapid desensitization [2].

The  $\alpha 7$ -nAChR has attracted considerable interest and been pursued as a potential therapeutic target for

numerous indications [3]. The  $\alpha 7$ -nAChR is abundant in brain regions such as the hippocampus and the prefrontal cortex that are important for cognitive functions. Therefore, drugs that activate or potentiate the receptor have been shown to be effective in preclinical models for cognitive disorders. Additionally, several therapeutics were tested through clinical trials in the context of Alzheimer's and Parkinson's diseases, as well as schizophrenia [4]. However, as of yet there has not been any approval for clinical use, either due to lack of efficacy or to adverse effects. The  $\alpha 7$ -nAChR is also an essential component of the cholinergic anti-inflammatory pathway, specifically its activation through excitation of the vagus nerve triggers release of anti-inflammatory cytokines [5]. Of note, the  $\alpha 7$ -nAChR is not only found as homopentamers in the brain, but also as heteropentamers in complex with the  $\beta 2$  subunit [6], as well as with the dup $\alpha 7$  subunit, which is a truncated subunit, associated with neurological disorders, lacking part of the N-terminal extracellular ligand-binding domain [7].

A lot of effort has been dedicated to developing small molecules specifically targeting the  $\alpha 7$ -nAChRs. Each nAChR subunit within the pentamer is composed of an extracellular domain (ECD) folded as a  $\beta$  sandwich, a transmembrane domain (TMD) consisting of four  $\alpha$ -helices, and an intracellular domain (ICD) consisting of two helices and a variably sized poorly resolved domain connecting the two [8, 9]. The endogenous neurotransmitter's (ACh) binding sites, also called orthosteric sites, are located at all of the subunit interfaces within the ECD of the homomeric  $\alpha 7$ -nAChR. Agonists, partial agonists, and antagonists all bind at the orthosteric site and were the first therapeutic focus, whereas negative (NAM) and positive (PAM) allosteric modulators binding outside of this site have also actively been investigated more recently [3]. Indeed, the very rapid desensitization of  $\alpha 7$ -nAChRs is expected to strongly limit the efficacy of conventional agonists, while allosteric modulators can potentially overcome this issue. In addition, PAMs and NAMs are expected to better maintain the spatio-temporal characteristics of endogenous ACh activation and to target non-conserved sites, increasing the chemical diversity of active compounds.

In chronological order, calcium was first identified as a PAM [10, 11] binding in the lower part of the ECD [8, 12]. Ivermectin was then identified as a PAM binding in the TMD [13]. Ivermectin can be classified as a type I PAM, potentiating the ACh-elicited current at the peak of the electrophysiological response but not impairing the downstream desensitization process. Subsequently, a large series of small molecules binding at the TMD were found to strongly modulate the receptor, as exemplified by the type II PAM: PNU-120596, that

not only potentiates the ACh-elicited currents but also inhibits desensitization to a large extent [9, 14]. Additionally, the PAM: 4BP-TQS can even activate the receptor by itself, thereby having both agonistic and modulatory properties outside of the orthosteric site (Ago-PAM) [15]. Finally, several modulatory sites for small fragments were identified at different levels of the ECD but have not, as of yet, been exploited for drug-design purpose [16, 17].

In addition to small molecules, an interest has recently grown around single-domain antibody fragments of camelids, generally termed nanobodies, in developing biotechnologies [18]. Nanobodies correspond to the variable domain (VHH) of the heavy chain-only antibodies expressed in these animals. Moreover, they usually bind to surface cavities [19] and motifs that often reorganize during conformational transitions of the receptor, thereby acting as conformation-specific ligands. In addition, nanobodies have a number of advantages over small molecules, notably: they usually have a high affinity, typically in the nanomolar range, as well as a high specificity conferred by the large surface of the nanobody-antigen interaction. As an example: within the pentameric ligand-gated ion channel family, nanobodies acting as PAMs and NAMs were reported on the serotonin type 3 (5-HT<sub>3</sub>) receptor [20], the GABA<sub>A</sub> receptor [21], and the bacterial ELIC [22]. The generation and functional

characterization of two nanobodies specifically targeting the  $\alpha 7$ -nAChR is presented herein.

## Results

### 1/ Two nanobodies were isolated from alpacas immunized with cells expressing the $\alpha 7$ -nAChR/m5-HT<sub>3</sub>A chimera.

To avoid the time-consuming and expensive production and purification of the  $\alpha 7$ -nAChR, alpacas were immunized with HEK 293 cells transiently transfected with a cDNA directing the expression of an  $\alpha 7$ -nAChR/5-HT<sub>3</sub>A chimera. This chimera, where the ECD of the human  $\alpha 7$ -nAChR is fused to the TMD of the mouse 5-HT<sub>3</sub>A receptor ( $\alpha 7$ -nAChR/m5-HT<sub>3</sub>A), is expressed at the surface of the cells at much higher levels than  $\alpha 7$ -nAChR [23, 24]. In addition, injecting transfected cells ensures that the receptor is correctly folded and inserted in the membrane as compared to a detergent solubilized receptor, thereby increasing the chances of isolating conformation-specific nanobodies. A similar approach has been successful for other membrane proteins such as the metabotropic glutamate receptors [25]. After immunization, the VHH-encoding sequences were amplified from the serum and a phage display library was generated (as described in the methods). In a single round of panning, the library was depleted twice through

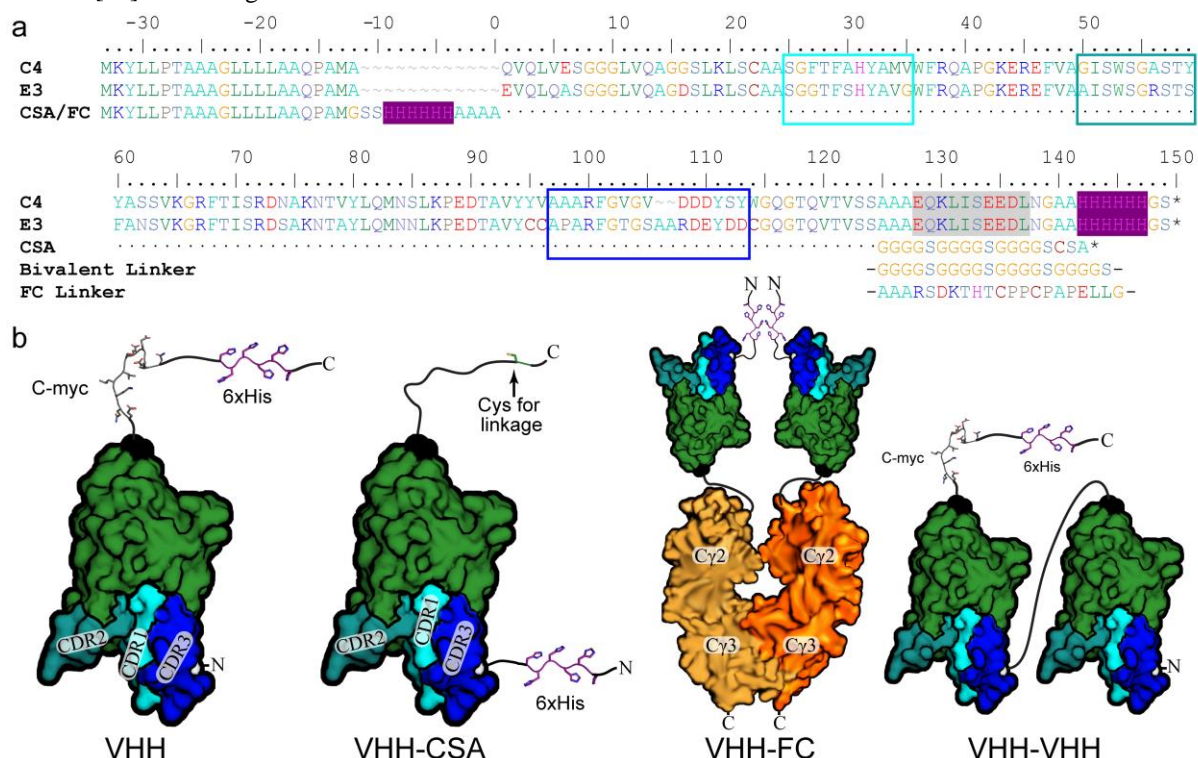

**Fig 1** VHH E3 and C4 with Related Constructs

**a** Sequence alignment of E3 and C4 VHHs with numbering starting after the signal peptide, although sometimes incomplete cleavage occurs and the preceding MA is left attached. The Myc tag is highlighted with gray shading, 6xHis tag highlighted in purple shading, and each CDR is boxed in cyan, teal, and blue (1,2,3 resp.). N- and C-terminal changes for the Fc, CSA, and bivalent constructs are also shown.

**b** Structural representation of each variation with the tags labeled and their side-chains represented as sticks, the N- and C-terminals labeled and colored (white and black resp.), as well as the CDRs labeled and color coded (similarly as in **a**).

incubation with non-transfected HEK 293 followed by an incubation with non-transfected Vero cells, after which Vero cells transfected with the  $\alpha 7$ -nAChR/m5-HT<sub>3</sub>A chimera were used to select phages binding to the  $\alpha 7$ -ECD. Isolated clones from the final two rounds of panning were then screened by an ELISA against transfected Vero cells. Seven unique sequences have been obtained from the combination of the second and third rounds of panning.

**2/ Immunofluorescence experiments show that C4 and E3 are specific for the  $\alpha 7$ -nAChR over  $\alpha 3\beta 4$ - and  $\alpha 4\beta 2$ -nAChRs.**

The clones were produced with a C-terminal Myc and His tag (named VHH in Fig 1b) and tested by immunofluorescence (using an anti-Myc secondary antibody) on cells transfected with either  $\alpha 7$ -nAChR/m5-HT<sub>3</sub>A or  $\alpha 7$ -nAChR. Among the seven

VHHs, C4 and E3 seemed to display specific labeling. Two variants of C4 and E3 were generated: 1/ VHH-CSA, carrying a C-terminal cysteine, allowing direct fluorescent labeling to avoid the use of secondary antibodies, and 2/ VHH-Fc, where VHHs are fused at the C-terminus with a human IgG Fc fragment permitting detection through a highly specific secondary anti-human Ig antibody, as well as inclining the formation of dimeric VHH domains due to the dimeric nature of the IgG-Fc, putatively increasing binding avidity (Fig 1b). The immunofluorescence of both constructs was carried out against non-permeabilized cells expressing the  $\alpha 7$ -nAChR (Fig 2). E3-CSA labeled with Alexa488 showed specific labeling of CHO cells stably expressing the  $\alpha 7$ -nAChR (Fig 2a). Whereas, the VHH-Fc constructs, combined with an anti-human IgG to label them, robustly displayed a nice decoration of the plasma-membrane for both E3-Fc

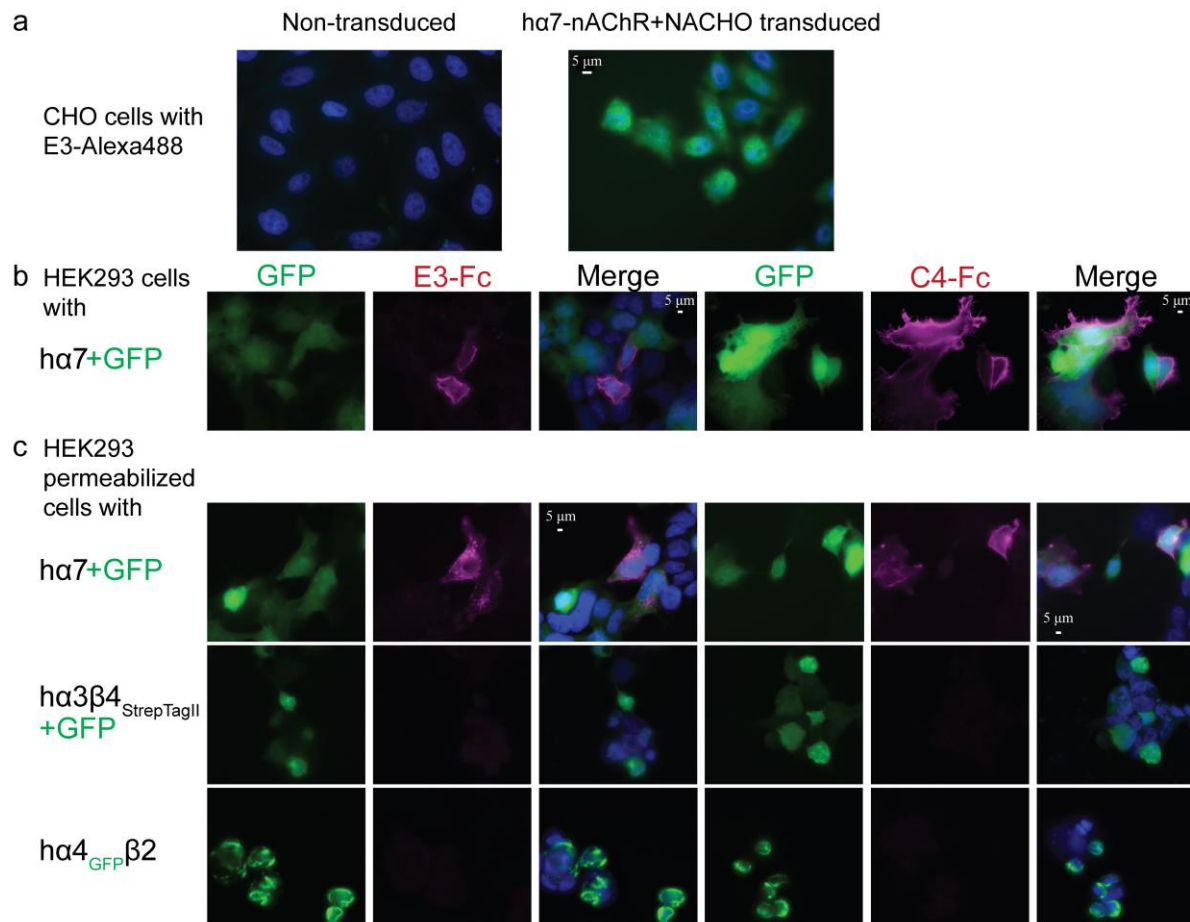

**Fig 2** VHH characterization by immunofluorescence

Dapi, shown in blue, stains the cells' nucleus. Alexa647, a red wavelength, is colored as magenta. Images are representative of at least n=4.

**a** Merged images (Dapi+GFP) of CHO cells (left) and with stable expression of  $\alpha 7$ -nAChR (right); immunostained with 1 $\mu$ g/mL of conjugated E3-CSA-Alexa488.

**b** Images (GFP, Alexa647, Merged [GFP+Alexa647+Dapi]) of non-permeabilized HEK 293 cells transfected with  $\alpha 7$ -nAChR immunostained with E3-Fc (left) and C4-Fc (right), demonstrating an extracellular binding. Cytoplasmic GFP indicates efficiently transfected cells.

**c** Images (GFP, Alexa647, Merged [GFP+Alexa647+Dapi]) of permeabilized HEK 293 cells expressing  $\alpha 7$ -,  $\alpha 3\beta 4$ <sub>StrepII</sub>- and  $\alpha 4$ <sub>GFP</sub> $\beta 2$ -nAChRs immunostained using E3-Fc (left) and C4-Fc (right). For  $\alpha 7$  and  $\alpha 3\beta 4$ <sub>Strep</sub>, cytoplasmic GFP indicates efficiently transfected cells. The nanobodies were detected by an anti-human IgG coupled to Alexa647 (red). Identical exposure times were used to visualize each channel on all conditions.

and C4-Fc on transiently transfected HEK293 cells (Fig 2b), and therefore this construct was used to assess each VHH's binding specificity. The combination of these results, conducted on non-permeabilized cells, suggests a binding motif in the ECD.

The interaction of the C4-Fc and E3-Fc constructs with  $\alpha 7$ -,  $\alpha 3\beta 4$ -, and  $\alpha 4\beta 2$ -nAChRs was tested on permeabilized transiently transfected cells to assess binding specificity. To visually pinpoint transfected cells, through fluorescence, either cytoplasmically fused eGFP ( $\alpha 4$ -nAChR) or an internal ribosome entry site (IRES) linked eGFP ( $\alpha 7$ - and  $\alpha 3$ -nAChR subunits) were used (Fig 2c). Both C4-Fc and E3-Fc label cells transiently transfected with  $\alpha 7$ -nAChR, while no labeling is observed for  $\alpha 3\beta 4$ - and  $\alpha 4\beta 2$ -nAChR transfected cells, demonstrating a strong selectivity of both constructs.

Interestingly, sequence analysis determined that both E3 and C4 diverge from the classical nanobody framework in that C4 contains only a single cysteine and thus no disulfide bridge, whereas E3 contains four cysteines, forming the canonical bridge between framework region (FR) 1 and FR3 domains, but also an unusual bridge flanking both extremities of the complementarity-determining region (CDR) 3 (Fig 1a).

### 3/ E3 and C4 bind outside of the orthosteric site.

To elucidate their binding mode, a competition assay with  $I^{125}$  labeled  $\alpha$ -Bungarotoxin ( $\alpha$ -Btx), a competitive and highly specific orthosteric antagonist, was performed. HEK293 cells transfected with the  $\alpha 7$ -nAChR/m5-HT<sub>3</sub>A chimeric construct used in panning experiments were suspended and incubated with 0.01 mg/mL VHH (556 nM E3 and 530 nM C4) and compared to 100  $\mu$ M ACh as a control (final concentrations, whose results were normalized to a buffer incubated sample). Scintillation reading of filtered samples, after the addition of a saturating, final, concentration of 5nM of  $I^{125}$ - $\alpha$ -Btx was added to this mixture,

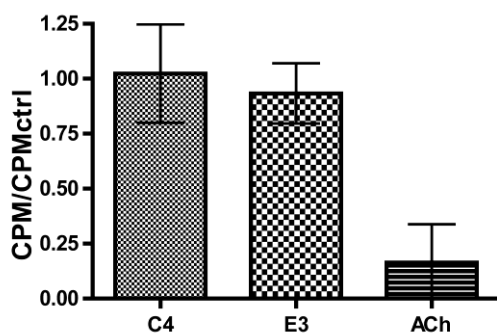

**Fig 3**  $I^{125}$ - $\alpha$ Btx Competition Binding to  $\alpha 7$ /m5-HT<sub>3</sub>A. Scintillation counts per minute (CPM) of 5nM  $I^{125}$ - $\alpha$ Btx bound to  $\alpha 7$ -nAChR/m5-HT<sub>3</sub>A transiently transfected HEK293 cells in competition with 1mM ACh or 556nM VHH. Mean of n=6, with error bars showing the standard deviation of the mean.

showed that there is no competition between  $\alpha$ -Btx and either VHH (Fig 3). This indicates that neither VHH binds to the orthosteric binding site, and therefore bind to an allosteric site elsewhere within the ECD.

### 4/ E3 is a potent and slowly associating type I PAM of the $\alpha 7$ -nAChR.

The functional effect of E3 and C4 (with a C-terminal Myc and His-tag) was investigated by two-electrode voltage clamp electrophysiology on *Xenopus* oocytes expressing the  $\alpha 7$ -nAChR (Fig 4). Perfusion of 1 mM ACh, in this methodology, evokes robust currents characterized by a fast onset of activation, a culmination at a peak, and a slower decay of activation whereupon receptor desensitization through prolonged agonist (ACh) application overcomes newly activating receptors, until the agonist is rinsed, and the receptor returns to its resting state. The effects of the nanobodies were investigated at a concentration of 30  $\mu$ M ACh, corresponding approximately to an EC<sub>10</sub> concentration to ensure maximal sensitivity of the system.

E3 does not elicit any current when applied alone (Fig 4d). In a first series of experiments, E3 was applied during an application of ACh ("post-perfusion condition", n=5 Fig 4a). At 800 nM, E3 elicits a clear increase of the current, that appears relatively slowly, followed by a time-dependent decrease, indicating that the nanobody favors the activation process but does not alter the downstream process of desensitization. This potentiating effect is dose-dependent. To further investigate the kinetics by which E3 modulates the function, several dose-response recordings were performed where E3 is directly co-applied with ACh ("co-perfusion condition", n=5 Fig 4b), or where it is additionally perfused for periods of 10, 30, 60 and 120s before the ACh/E3 co-application ("pre-perfusion conditions", n=5 each time-point Fig 4e). Longer pre-perfusion conditions generated significantly larger potentiation, especially at low nanobody concentrations where 316 nM E3 (a concentration near that which was used in the radioactive binding experiments) obtained near maximal potentiation, indicating that the nanobody associates to the receptor with a slow kinetics in the recording conditions. This slow kinetics is thought to be the main reason for the moderate potentiation observed in "post-perfusion" conditions. Indeed, in these conditions, E3 will slowly bind and potentiate the receptor, a process during which a significant fraction of the activated receptors will desensitize, generating a net reduction of the peak current. Additionally, using a 1  $\mu$ M concentration of E3 did not produce any significant shift in the apparent EC<sub>50</sub> of ACh (n=7 Fig 4f). Altogether, E3 has the hallmarks of a type I PAM, with low nanomolar apparent affinity, and with a slow binding kinetic.

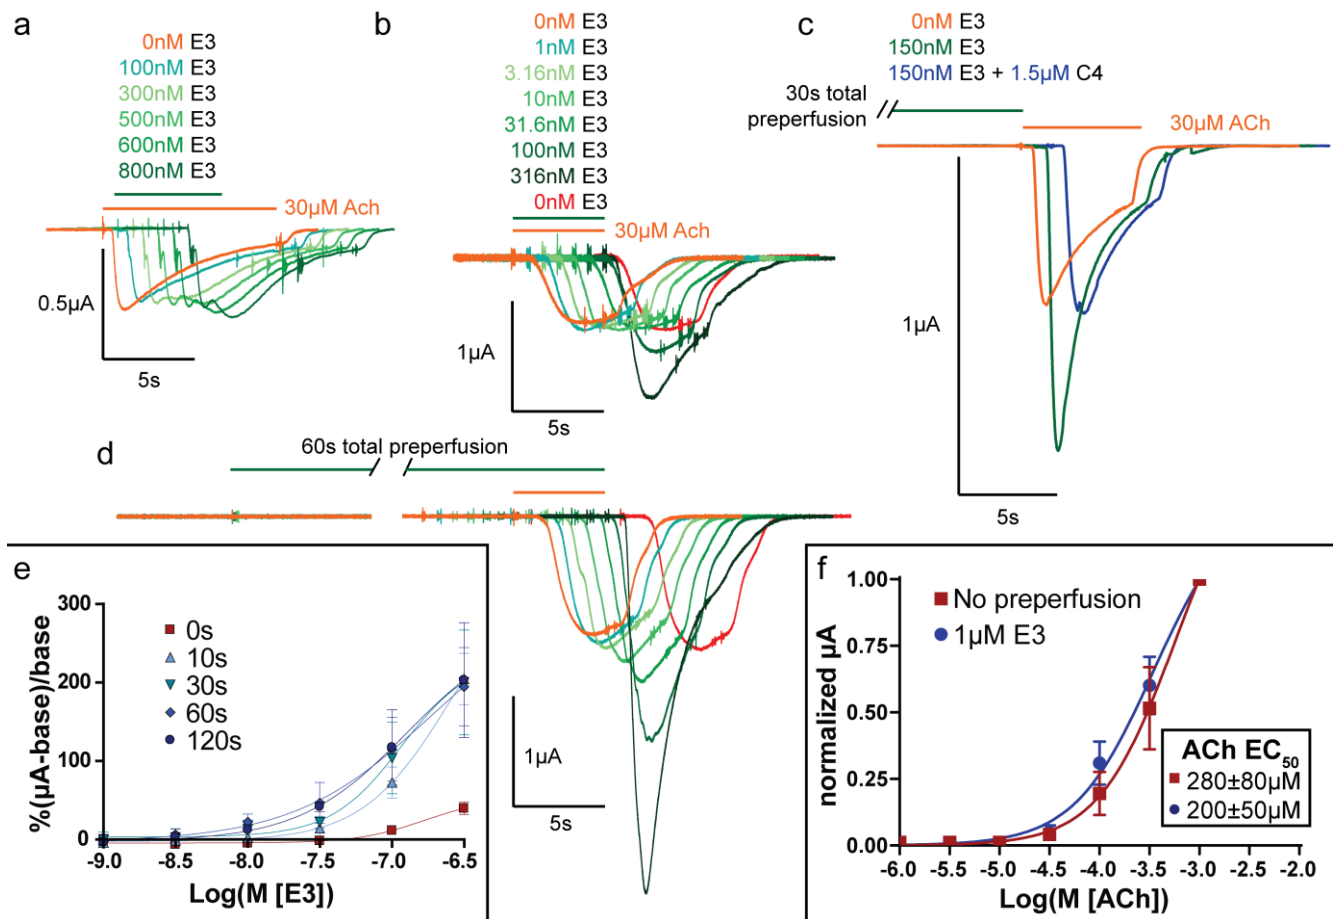

**Fig 4** E3-VHH Characterization by Electrophysiology

Representative concentration dependent traces with respective color-coded concentrations of VHH E3 by oocytes injected with a  $\alpha 7$ -IRES-NACHO plasmid. Traces are all on the same oocyte and applied chronologically in the same order as listed. To make a distinction between each subsequent trace, they are offset with the same interval from the perfusion bars of the first trace.

**a** “Post-perfusion” protocol with E3 co-applied in the middle of a 30 $\mu$ M ACh response. (representative of n=5)

**b** “Co-perfusion” protocol with E3 co-applied for the same duration as 30 $\mu$ M ACh (representative of n=5).

**d** “Pre-perfusion” protocol using 60s pre-perfusion of E3 (the baseline stays flat the entire time, which is not shown) with the same concentrations listed in **b** (representative of n=5).

**b & d.** 30 $\mu$ M ACh response without E3 (0nM) at the beginning and end of the dose-response curve show a complete wash of E3 and stable response of the oocyte.

**c** Representative trace (of n=5) of C4 and E3 competition using a modified 30s “purely pre-perfusion” protocol, indicating that the two VHH’s compete for an overlapping binding site.

**e** Percent potentiation of 30 $\mu$ M ACh peak response (base) by various pre-perfusion times of VHH E3 in a dose-dependent manner (n=5 each). Maximum potentiation is achieved by 60s pre-perfusion with 30s producing only a slightly smaller potentiation, therefore it was decided to keep a 30s pre-perfusion for subsequent experiments.

**f** ACh concentration response curves using a 30s “pre-perfusion” protocol with and without a fixed concentration (1 $\mu$ M) of E3. Data show that ACh affinity is not significantly altered by E3. Values are normalized to the peak of 1mM ACh and shown as the mean of n=7 with the error bars displaying the standard deviation.

#### **5/ C4 acts as a SAM that competes with E3 binding.**

Whereas, C4 elicited no response on its own nor showed any discernable modification of  $\alpha 7$ -nAChR function when co-applied with ACh (data not shown). Interestingly, when using a modified 30s “purely pre-perfusion” procedure without intersweep washing (see Methods), the ACh-gated current with a pre-perfusion of a mixture of C4 (1.5  $\mu$ M) with E3 (150 nM) is identical to that in the absence of nanobodies, whereas E3 (150 nM) pre-perfused alone on the same oocyte just before the

application of this mixture produced tangible potentiation (n= 5, Fig 4c). Altogether these data, along with the immunofluorescence, show that C4 binds to the receptor (in both oocytes and human cells). The data also leads to the classification of C4 as a silent allosteric modulator (SAM), as it does not generate discernable current in the absence or presence of ACh, and moreover it totally abolishes the potentiation of the currents elicited by the co-perfusion of ACh with E3. The blocking of E3’s effects indicate that C4 binds to a site overlapping, at least partially, with its potentiating site. It is

noteworthy that comparison of the sequence of E3 and C4 show significant conservation at CDR1, CDR2 and half of CDR3, further arguing for overlapping binding sites. Most importantly these data indicate that this allosteric ECD site is capable of various modulatory actions akin to the orthosteric site.

#### 6/ Bivalent E3-E3 is a quasi-irreversible type I PAM.

To increase the affinity and avidity of E3 against  $\alpha 7$ -nAChR, a bivalent construct was generated, where two E3 nanobodies are separated by a 16-residue flexible linker (Fig 1). E3-E3 displays potentiating properties similar to that of E3 (n=11 Fig 5a & n=4 Fig 5b). Strikingly, the potentiating effect of E3-E3 did not vanish upon prolonged wash out of the oocyte (Fig 5c), achieving  $94 \pm 12\%$  of the initial maximal potentiating current with repeated applications of  $30 \mu\text{M}$  ACh alone out to  $\sim 50$  min (for n=4) after the last application of E3-E3. Whereas, the

effect of E3 totally vanished upon 5 min of washing (Fig 4b&d). E3-E3 is at least as efficient as E3 to potentiate the ACh-elicited currents, but evaluation of a concentration dependent curve is rendered moot with the impossibility of washing out the construct. Thus, the avidity conferred by the bifunctional character makes E3-E3 a quasi-irreversible potentiator in the oocyte recording system. Even though it is quasi-irreversible, using a  $1 \mu\text{M}$  concentration of E3-E3 did not produce any significant shift in the apparent  $\text{EC}_{50}$  of ACh (n=4 Fig 5b).

#### Discussion

The classical technique to generate specific nanobodies against a given target is to immunize alpacas with purified protein, a procedure that requires large quantities of protein ( $>1\text{mg}$ ). Within the pentameric ligand-gated ion channel family, this technique has been successfully applied for members yielding good expression in recombinant

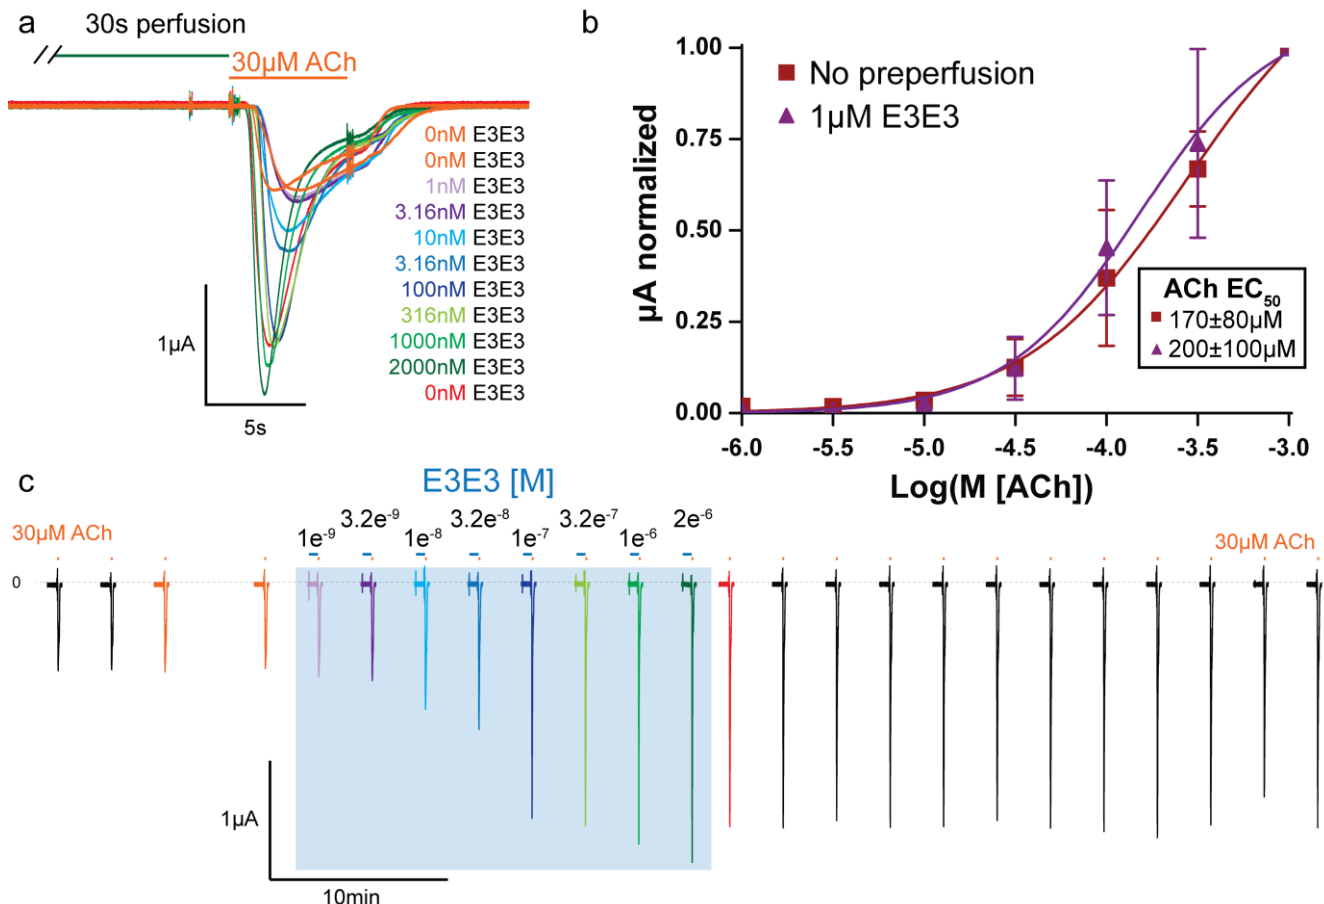

**Fig 5** E3-E3 VHH Characterization by Electrophysiology

**a** Representative (of n=11) overlay of concentration dependent traces with respective color-coded concentrations of E3-E3 bivalent VHH using a “purely pre-perfusion” protocol.

**b** ACh concentration response curves using a 30s “pre-perfusion” protocol with and without a fixed concentration ( $1 \mu\text{M}$ ) of bivalent E3-E3, where effectively the oocyte is in a constant presence of the bivalent VHH. Data show that ACh affinity is not significantly altered by the bivalent E3-E3. Values are normalized to the peak of  $1\text{mM}$  ACh and shown as the mean of n=4 with the error bars displaying the standard deviation.

**c** An extension of the same traces from A. (similarly color coded) shown in a continuous chronological fashion, where additional applications of  $30 \mu\text{M}$  ACh alone are included (not shown in A.) before and after the concentration dependent application of E3-E3 bivalent VHH (traces within blue box). Data show that potentiation is maintained even 40 min after last application of the bivalent E3-E3.

systems such as the ELIC [22], the 5-HT<sub>3</sub> receptor [20], and the GABA<sub>A</sub> receptor [21]. This article focuses on the  $\alpha$ 7-nAChR, a subtype that shows low levels of expression in recombinant systems [8]. To avoid the time-consuming overexpression and purification steps, direct immunization with a cell-line transiently transfected with a h $\alpha$ 7-nAChR/m5-HT<sub>3A</sub> chimera that has good expression levels was performed. Such a procedure is expected to stimulate the production of a wide range of nanobodies recognizing many proteins present at the surface of the cells. Therefore, a carefully designed panning strategy was completed, yielding, after a few rounds, two nanobodies that bind specifically to the  $\alpha$ 7-nAChR. The procedure has also the advantage of injecting membrane-inserted protein, ensuring native pentameric assembly of the receptor, increasing the chance to isolate antibodies targeting a properly folded ECD in a pentameric conformation. This procedure should be applicable to other pentameric ligand-gated ion channels with weak expression levels and/or low stability after extraction from the plasma membrane.

The PAM properties of E3 suggest that the nanobody binds with higher affinity to the active state as compared to the resting state of the  $\alpha$ 7-nAChR. Interestingly, the  $\alpha$ 7-nAChR is activated by choline with an EC<sub>50</sub> around 500  $\mu$ M in an oocyte, with choline already producing clearly detectable responses at concentrations of 30  $\mu$ M or less [26]. Since levels of choline in human plasma have been reported to range between 5 to 15  $\mu$ M [27], it is possible that such a concentration in the alpaca plasma would stabilize a significant fraction of the receptor on the cells which were injected in the active or desensitized conformational states during immunization to direct the generation of a PAM. In addition, the type I PAM character of E3 suggest that the nanobody binds with similar affinities to the active and desensitized state, thereby not impairing the kinetics and extent of the desensitization process. The generation of a SAM, in C4, is consistent with this assessment as a VHH that equally binds the resting state and active state would be equally possible in such an environment. An equal conformational affinity would stabilize neither state, and thereby lack a functional modulation.

Structural and/or mutational studies of the  $\alpha$ 7-nAChR in complex with the described nanobodies are required to fully understand their mechanism of action. To date, several nanobodies or even fragments of antibodies have been structurally resolved with pentameric ligand-gated ion channels. These structures help gleam possible binding locations for E3 and C4. From these structures, two regions can be directly excluded from the fact that no competition with  $\alpha$ -Btx is observed. The first, an exterior site just below the orthosteric pocket, structurally resolved on GABA<sub>A</sub> [28, 29] and a

nAChR [30] and the second, an exterior binding site directly overlapping and slightly above that of  $\alpha$ -Btx, found with the 5-HT<sub>3</sub> receptor [20]. A third site on the complementary subunit to the right of and slightly above the orthosteric pocket, visualized on ELIC [22] and GABA<sub>A</sub> [31] respectively, is likely occluded in the  $\alpha$ 7-nAChR due to a unique glycosylation site. This site in the prokaryotic ELIC was found to have PAM effects. It may still be possible that the VHH's accommodate for a sugar moiety in this region. Finally two apical sites have been observed: the main immunogenic region, bound by an antibody fragment on a nAChR [32], and a single VHH that has multiple interactions with the apex of the ELIC, laying on the top and interacting through the CDRs with multiple subunits in the vestibule [22]. The later was determined to be a NAM and through its binding pose it would be predicted that it would not be conducive to an enhancement of avidity through bivalent binding. Whereas, the former was also found to have a slight increased affinity on agonist binding but no electrophysiological effects at saturating agonist concentrations. Therefore, of the currently resolved binding locations the data would be compatible with two regions, both of which have also hinted to positive modulatory effects. In conclusion, E3 binds outside of and above the orthosteric site, at an apical position. Structural and/or mutational studies are necessary to determine the exact location of VHH binding.

Interestingly, the dimerization of E3 allows the formation of a quasi-irreversible type I PAM. This striking effect is probably related to an increase of the avidity of this bivalent molecule. In retrospect, this feature probably explains why, in immunofluorescence experiments that involves several rinsing steps after VHH binding, the labeling by monovalent E3 was weak, while that of bivalent E3-Fc was robust. Several examples of dimerization of nanobodies directed against viral proteins have been reported to potentiate the neutralizing activities of the parental nanobody [33–36]. This bivalent construct can serve as a unique therapeutic agent, especially for neurodegenerative disorders where  $\alpha$ 7-nAChR expression is diminished, potentially permanently amplifying nAChR response signals without having a temporal effect (through modification of binding/desensitization properties) on the nAChR response.

## Conclusions

The two nanobodies C4 and E3 constitute a novel class of allosteric modulators of the  $\alpha$ 7-nAChR. They show high specificity among nAChR subtypes, a feature characteristic of antibody-antigen recognition that involve a large area of interaction. These nanobodies are easily expressed in milligram amounts in cell-lines and can be easily engineered as illustrated here by the generation of a quasi-



irreversible bivalent potentiator. They will be useful for a wide range of applications, notably the investigation of native receptors in brain tissues in immunofluorescence and immunoprecipitation assays. They will also be precious for the investigation of the receptor and as pharmacological tools to help structural studies. Finally, they constitute an original family of allosteric modulators with far reaching potential medical applications such as cognitive enhancers, or as a potential treatment against  $\alpha 7$ -nAChR auto-antibodies that are found in some patients diagnosed with schizophrenia [37].

## Methods

### *Animal immunization*

All immunization processes were executed according to the French legislation and in compliance with the European Communities Council Directives (2010/63/UE, French Law 2013-118, February 6, 2013). The Animal Experimentation Ethics Committee of Pasteur Institute (CETEA 89) approved this study (2020-27412). We subcutaneously injected an adult alpaca at days 0, 21, and 28 with approximately  $10^8$   $\alpha 7$ -nAChR/m5-HT<sub>3</sub>A chimera-transfected HEK293 cells mixed with Freund complete adjuvant for the first immunization and with Freund incomplete adjuvant for the following immunizations. Repetitive immunogen administrations were applied to stimulate a strong immune response. A blood sample of about 250 mL of the immunized animal was collected and a Phage-Display library in a pHEN6 phagemid vector of about  $2 \times 10^8$  different clones was prepared as described before [38], and detailed below.

### *Molecular biology*

The plasmids for all nAChR constructs were human (h). pcDNA3.1+ vector was used for all constructs containing an internal ribosome entry site (IRES). The pMT3 vector was used for the eGFP alone and the  $\alpha 4$ -nAChR which contained an ICD linked GFP ( $\alpha 4_{GFP}$ ); where an eGFP sequence was inserted in the cytoplasmic domain between SCK<sub>395</sub>/S<sub>396</sub>PS following the mouse  $\alpha 4$ -nAChR construct created by Nashmi, R. et al. [39]. The pCMV6-XL5 vector was used for the NACHO construct [40].  $\alpha 7$ - and  $\alpha 3$ -nAChR-IRES-eGFP constructs, used for immunofluorescence experiments, contained the respective nAChR sequence, followed by an IRES element from the encephalomyocarditis virus, and then the coding sequence of eGFP (sequences extracted from pIRES2-EGFP, Clontech). H $\beta 4$ <sub>StrepTagII</sub>-IRES-mTurquoise, contained the human  $\beta 4$  sequence with a C-terminal StrepTagII the aforementioned IRES element followed by an mTurquoise GFP. For transduction into the CHO-K1 cell-line  $\alpha 7$ -nAChR-IRES-eGFP, along with the chaperone protein constructs: NACHO-IRES-mKate and Ric3-IRES-TdTomato, were cloned into a

modified pTRIP $\Delta$ U3 vector with a CMV promoter, and lentiviral particles created as described in the supplementary methods of Maskos, U. et al.[41]. In the case of the  $\alpha 7$ -nAChR plasmid used in two-electrode voltage clamp experiments the IRES was followed by the coding sequence for NACHO. Synthetic genes of the anti- $\alpha 7$  nanobody derivatives were designed and purchased from EurofinsGenomics (Ebersberg, Germany), digested using SfiI and NotI and ligated into the pHEN6 phagemid [42].

### *-Library creation through PCR amplification of VHH DNA from serum:*

About 250 mL bloodletting samples of the immunized alpaca in EDTA-coated tubes were collected and inverted twice to inhibit coagulation. Histopaque-1077 (Roche) was employed to separate lymphocytes according to the manufacturer's instructions. Total RNA was extracted, following the RNeasy minikit (Qiagen) protocol, from isolated lymphocytes and its purity verified using the Agilent RNA 6000 Nano Assay system.

This total RNA was subsequently reverse-transcribed to generate a diverse cDNA library. This cDNA was then amplified by overlap extension PCR which allows for the isolation of the ~400bp VHH domain. These PCR fragments were also digested using SfiI and NotI and ligated into the pHEN6 phagemid, which was transformed through electroporation into *E. coli* TG1 cells.

### *Cell culture*

HEK293 and Vero cells were cultured in high glucose Dulbecco's Modified Eagle Medium supplemented with 110 mg/L sodium pyruvate and 862 mg/L of L-alanyl-glutamine as well as 10% fetal bovine serum (DMEM-FBS) with or without the addition of an antibiotic mixture of penicillin/streptomycin (10 U/ml and 10  $\mu$ g/ml respectively) at 37°C with 5% CO<sub>2</sub>. Expi293F cells were maintained at 99% viability per manufacturer's recommendations in Expi293™ Expression Medium (ThermoFisher) at 37°C with 8% CO<sub>2</sub> under constant agitation and passed every three days. CHO-K1 cells were cultured in DMEM/F12 Medium (Gibco) supplemented with 10% FBS and penicillin/streptomycin (10 U/ml and 10  $\mu$ g/ml) at 37°C with 5% CO<sub>2</sub>.

### *-Generation of the $\alpha 7$ -nAChR-CHO-K1 stable cell line:*

Lentiviral particles were directly added to CHO-K1 cells during their seeding at  $1 \times 10^5$  cells/well respecting a particle ratio of 5:1:1 ( $\alpha 7$ -nAChR-IRES-eGFP, NACHO-IRES-mKate, Ric3-IRES-TdTomato respectively) which was achieved using 1  $\mu$ g of p24 for  $\alpha 7$ -nAChR particles and 0.2  $\mu$ g for the chaperones. After 3 days of expression, cells were sorted by FACS (FACS-Aria III; BD Life

Sciences) and cells expressing the 3 reporter genes were seeded in 96 wells plate to obtain individual clones. Clones expressing a high level of  $\alpha 7$ -nAChR at the plasma membrane were selected by  $\alpha$ -Btx immunostaining.

#### *Biopanning by Phage-Display on cells*

To produce nanobody-phages, 100  $\mu$ l of the *E. coli* TG1 library was inoculated into 100 ml of 2xYT medium (Tryptone 16g/L, Yeast Extract 10g/L, NaCl 5g/L, pH 7) supplemented with ampicillin (100  $\mu$ g/ml) and glucose (1%). The culture was grown at 37°C under shaking at 200 rpm until OD<sub>600</sub> (optical density at  $\lambda$ 600) reached ~0.5-0.6. Recombinant nanobody-displaying phages were rescued with  $2 \times 10^{11}$  PFU of M13KO7 Helper phage (New England Biolabs). Rescued phages were suspended in 1 ml of phosphate buffered saline (PBS, Gibco) supplemented with bovine serum albumin (BSA, Sigma-Aldrich) at a final concentration of 1% (PBS-BSA).

In a round of panning, 0.5 mL of produced nanobody-phages was added to 4.5 mL of PBS-BSA solution as a phage panning medium.  $1 \times T75$  confluent HEK cells ( $\sim 10^7$ ) were washed with PBS and resuspended to individual cells. The suspension was centrifuged at 2000 rpm at 4°C for 15 minutes. Cells were resuspended with 5mL phage panning medium for the first-depletion round, and maintained at 4°C for 1 h with gentle shaking. The suspension was then centrifuged (same conditions as above) where the supernatant phages were recovered. This depletion step was repeated and then completed once more on Vero cells (5 mL,  $\sim 2^7$ ) to eliminate non-specific nanobodies directed against common membrane proteins. Phages were then finally incubated with  $\alpha 7$ -nAChR/m5-HT<sub>3A</sub> chimera-transfected Vero cells, again in 5 mL at 4°C for 1 h with gentle shaking to select target-specific nanobody-phages. After incubation, suspension was centrifuged (as above) and washed 10 times with PBST (PBS with 0.01% Tween 20) (each time for 10 minutes), followed by 2 washes with PBS to remove Tween 20. The cells were then lysed with 1 mL of 100 mM triethylamine (Sigma-Aldrich) for 5 minutes at 4°C and pH was neutralized with 0.5 mL of 1M Tris (pH 7.4). Eluted phages (in triethylamine lysate) were amplified by infecting exponentially growing *E. coli* TG1 at OD<sub>600</sub> of ~0.5 to propagate phages for the next round of selection.

#### *Enzyme-linked immunosorbent assay (ELISA)*

96 isolated clones from the second and the third rounds of panning were tested for nanobody-phage specific binding to  $\alpha 7$ -nAChR in cell-ELISA.

$\alpha 7$ -nAChR/m5-HT<sub>3A</sub> chimera-transfected Vero cells ( $10^5$  cells/mL) were coated onto 96-well plates pretreated with poly-D-Lysine (Sigma-Aldrich), according to manufacturer's recommendations. A

negative control (non-transfected Vero cells) was prepared under the same conditions. Cells were then fixed by addition of 4% (w/v) paraformaldehyde (Sigma-Aldrich) in PBS for 20 min, culture were then rinsed three times with PBS and treated with 3% (w/v) hydrogen peroxide (BioRad) in PBS for 5 min to minimize endogenous peroxidase activity, and finally washed twice in PBS. Plates were then blocked with PBS-BSA for 1h at 37°C.

Nanobody-phage unique clones were separately grown in 300  $\mu$ l of 2xYT medium supplemented with ampicillin (100  $\mu$ g/ml) in a 96-deep wells plate, unique nanobody-phage's production was induced by co-infection with the Helper Phage and culture was left overnight at 30°C under shaking. The supernatant was retrieved by centrifugation (2500 rpm/20 minutes at 4°C) and the produced unique phages were tested in parallel for their specific binding on  $\alpha 7$ -nAChR/m5-HT<sub>3A</sub> chimera-transfected Vero cells and on non-transfected ones as a control. The supernatant was diluted to 1/5 in PBS-BSA, and 100  $\mu$ l of the dilutions were applied to fixed cells in corresponding wells, after incubation for 1h at 37°C, plates were washed 3 times with PBST, and bound nanobody-phages were labelled by the addition of anti-M13 antibody [HRP] (SinoBiologicals). After 5 washes with PBST, HRP substrate reagent (OrthoPhenyleneDiamine, Sigma-Aldrich), prepared according to manufacturer's recommendation, was added. The reaction was stopped by the addition of 50  $\mu$ l per well of 3M HCl, and the absorbance of the samples was measured at 492  $\lambda$  in a spectrophotometer-microplate reader (Sunrise, Tecan). Samples with an absorbance ratio (positive/control) exceeding 3 were considered as  $\alpha 7$ -positive clones. These were then sequenced, and the sequences were analyzed.

#### *Anti- $\alpha 7$ -nAChR nanobody engineering, expression, and labeling*

##### *-Engineering:*

The pHEN6 vector used for library construction allows for direct bacterial periplasmic expression and purification of selected nanobodies with a cMyc tag and a 6xHis tag at their C-terminal (VHH in Fig 1).

The gene coding for a monovalent nanobody with a 6xHis tag in the N-terminal and an extra C-terminal Cys-Ser-Ala motif (CSA) enables site-specific labeling of the nanobody via maleimide (VHH-CSA in Fig 1) [43]. The gene for the bivalent derivative is composed of two molecules of the same nanobody linked together by a flexible (GGGGS)<sub>3</sub> linker, with a cMyc tag and a 6xHis tag at the C-terminal (VHH-VHH in Fig 1). The VHH-Fc gene had the C-terminal linker listed in Fig 1.

#### *-Expression:*

Genes were cloned into the pHEN6 vector for periplasmic expression in the *E. coli* strain: BL21(DE3). Proteins were produced as periplasmic components in 1 L of the NZY Auto-Induction TB medium (NZytech) according to the manufacturer's recommendations and were purified by immobilized metal affinity chromatography on a HiTrap TALON® crude 1 mL column (Cytiva). After extensive washings with PBS containing 150 mM NaCl (PBS/NaCl), proteins were eluted in PBS/NaCl buffer supplemented with 500 mM imidazole. Bacterial production yields varied from 1-12 mg/L of culture.

Alternatively, the nanobodies' engineered genes were cloned into a pFUSE-derived vector (InvivoGen); this vector harbors a human IgG1-Fc domain. Consequently, the nanobody was expressed as a Fc-fusion bivalent antibody. The vector was used to transfect Expi293F mammalian cells (ThermoFisher), and protein expression was carried out according to manufacturer's recommendations. Protein was then purified from the expression medium by affinity chromatography on a 1 mL protein G column (Cytiva). After sample application, the column was washed with 20 column volumes of PBS and the protein was subsequently eluted with 10 column volumes of PBS supplemented with 0.1 M Glycine (pH=2.3). Production yields were above 25 mg/L of culture.

#### *-Labeling:*

Site specific labeling of the engineered nanobody was done using maleimide Alexa Fluor™ 647 C2 or Alexa Fluor™ 488 (ThermoFisher). Briefly, the anti- $\alpha 7$  nanobody with additional CSA motif was surrendered to a mild reduction by adding 10 molar excesses of tris(2-carboxyethyl) phosphine (TCEP) (Sigma-Aldrich) at 25°C for 30 minutes. Reduced protein was then incubated for 2 hours with 20 molar excess of the respective maleimide Alexa Fluor dissolved in DMSO. Labeled protein was filter-dialyzed against 10 L of PBS using a 3K-CutOff Slide-A-Lyzer™ Dialysis Cassette (ThermoFisher). Labeling quality was assessed by Mass Spectrometry as previously described [44].

#### *Immunofluorescence*

Transduced CHO-K1 cells expressing  $\alpha 7$ -nAChR and chaperone proteins were cultured on 50 $\mu$ g/ml poly-D-lysine (Sigma-Aldrich) and 330 $\mu$ g/ml Collagen type 1 (Sigma-Aldrich) coated glass coverslips. 48h later, the cells were fixed with 2% paraformaldehyde (PFA) for 15 min followed by blocking of non-specific binding, with 3% BSA in PBS for 1h. The nanobodies were diluted to 5 $\mu$ g/ml with PBS-BSA and incubated with the coverslips for 2h at room temperature.

HEK293 cells were cultured on poly-D-lysine (Sigma-Aldrich) coated glass coverslips, according to manufacturer's recommendations. These cells were transfected using 10  $\mu$ g DNA and the JetPrime transfection reagent (Polyplus), again according to manufacturer instructions. 48h-36h after transfection, cells were fixed with 4% PFA and for permeabilized cells incubated for 2 min with a solution of ethanol+methanol (1:1). Non-specific binding was blocked with 10% BSA in PBS for 5 min at room temperature. The nanobodies were diluted to 5 $\mu$ g/ml also with 10% BSA in PBS and incubated with the coverslips for 2h at room temperature.

The  $\alpha 7$ -IRES-eGFP and NACHO plasmids were transfected together (2:1 ratio), the  $\alpha 3$ -IRES-eGFP and  $\beta 4_{\text{StrepTagII}}$ -IRES-mTurquoise were transfected together (1:1 ratio), and a plasmid containing the  $\beta 2$ -nAChR subunit was transfected together with the  $\alpha 4_{\text{GFP}}$  construct (1:1 ratio). Proper expression of the respective nAChRs was verified by an anti-StrepTagII antibody for the  $\alpha 3\beta 4$ - $\beta 2$ -nAChR, by the fused GFP for the  $\alpha 4_{\text{GFP}}\beta 2$ -nAChR, and with an Alexa647 labeled  $\alpha$ -Btx for the  $\alpha 7$ -nAChR (Supp Fig 1). Anti-StrepTagII antibody and  $\alpha$ -bungarotoxin-Alexa647 (ThermoFisher) were diluted in PBS-BSA.

Coverslips were mounted on slides after Prolong-DAPI staining (Invitrogen) and visualized using epifluorescence at constant exposure times. Anti-human IgG and anti-mouse IgG coupled to Alexa647 (ThermoFisher) were diluted in PBS-BSA. All experiments were reproduced  $\geq 4$  times.

#### *Radioactive $I^{25}$ - $\alpha$ -Btx competition assay*

HEK-293 cells were seeded, 48 h before transfection, at a density of  $5 \times 10^5$  per 100mm dish in DMEM-FBS supplemented with penicillin/streptomycin (10 U/ml and 10  $\mu$ g/ml respectively). When cells were approximately 70%-80% confluent, they were transfected with 10 $\mu$ g of the  $\alpha 7$ -nAChR/m5-HT<sub>3</sub>A chimeric construct using the JetPrime reagent (Polyplus) according to the manufacturer's protocol, and incubated for another 48 h. Cells were washed and detached using a cell dissociation solution non-enzymatic (non-trypsin) (Sigma-Aldrich). Cells were resuspended to individual cells in 2mL of binding buffer (10mM HEPES, 2.5mM CaCl<sub>2</sub>, 2.5mM MgCl<sub>2</sub>, 82.5mM NaCl, pH 7.2) in the presence of cocktail protease inhibitor (one tablet of cOmplete per 50 mL [Sigma-Aldrich]). Three replicates of 150 $\mu$ L from this resuspension were pipetted to glass vials for each sample. 25 $\mu$ L of each tested VHH (0.1mg/mL) was added with 25 $\mu$ L binding buffer in the control and ACh samples. After an hour incubation at 4°C under agitation, 25  $\mu$ L of binding buffer was added to all samples and 25  $\mu$ L of 1mM ACh was added to the ACh sample which were all incubated under

agitation for 1h at 4°C. Finally, 50 µL of 25 nM I<sup>125</sup>-Tyr54- $\alpha$ -Btx was added, the samples were well mixed and incubated for 2 h at 4°C. This resulted in final concentrations of 556 nM E3 VHH, 530 nM C4 VHH, or 100µM ACh, and 5nM I<sup>125</sup>- $\alpha$ -Btx. Glass microfiber papers, blocked using 5% skim milk for at least 30min, were then used to vacuum-filter the samples and counts per minute measured using a Berthold LB2111 machine.

#### *Two-electrode voltage-clamp electrophysiology*

*Xenopus laevis* oocytes (EcoCyte Bioscience, Germany and Centre de Ressources Biologiques–Rennes, France) kept in Barth solution buffer (87.34 mM NaCl, 1 mM KCl, 0.66mM NaNO<sub>3</sub>, 0.75 mM CaCl<sub>2</sub>, 0.82mM MgSO<sub>4</sub>, 2.4 mM NaHCO<sub>3</sub>, 10 mM HEPES pH 7.6) were nucleus injected with ~5-8 ng of h $\alpha$ 7-IRES-NACHO and ~1ng eGFP plasmids and stored at 16°C-18°C for 48-96 h.

Current recordings were performed using: Axon Digidata 1550A digitizer (Molecular Devices), Axon Instruments GeneClamp 500 amplifier (Molecular Devices), a self-built automated voltage controlled perfusion system, which controls an 8-port and a 12-port electric rotary valve (Bio-Chem Fluidics) both connected to a 2-way 4-port electric rotary valve (Bio-Chem Fluidics) which was flush with the recording chamber entrance allowing for rapid solution application and clean solution exchange, and finally pClamp 10.6 software (Molecular Devices). Electrode pipettes were pulled using a Narishige PC-10 puller. GFP positive oocytes were voltage-clamped at -60mV, unless otherwise noted, and perfused by Ringer's solution buffer (100 mM NaCl, 2.5 mM KCl, 10 mM HEPES, 2 mM CaCl<sub>2</sub>, 1 mM MgCl<sub>2</sub>, pH 7.3), with sampling at 5kHz, unless otherwise noted. ACh and size-exclusion purified VHH's were diluted in Ringer's buffer as specified. ClampFit 10.6 (Molecular Devices) was used for trace analysis and GraphPad Prism 4 (GraphPad Software) for data plotting and statistical analysis. Data are shown as mean  $\pm$  standard deviation, where each n represents a different oocyte.

The mechanical turning of the valves in the perfusion system produces a noise seen during the recordings, which was not filtered out, allowing for easy recognition of solution exchange times. The main valve allows for one solution to flow to the recording chamber and at the same time the other connected valve, if open, flows to waste. The main 2way/4-port valve exchange time was about 200ms and there is around a 500ms delay between the end of the exchange and arrival of the solution to the oocyte. Solution to be perfused to the chamber was started at least 4s before in the direction of waste to ensure proper rinsing of valve tubing. All recordings contained a five-minute start to start wash time between sweeps, unless otherwise noted.

“Pre-perfusion” protocol: The flow of the denoted concentration of VHH applied 6s after the start of the sweep to the recording chamber allowing for a proper analysis of the leak/background current. 10-120s later the main valve was switched to flow a solution that contained the same concentration of VHH with 30µM ACh (or the denoted concentration in the case of ACh dose-response curve). The valve flowing the VHH alone solution (now to waste) was switched to Ringer's solution shortly after. Five seconds later the main valve was changed back to flow the Ringer's solution to the chamber and the other side valve was closed with the sweep finishing recording eight seconds later.

“Purely pre-perfusion” protocol: Once it was determined that the VHH's had a slow on and offset time in order to conserve product and simplify solutions, the pre-perfusion protocol was changed to have only a 30µM ACh solution applied for the five second activation after pre-perfusion of VHH in Ringer's solution, rather than the mixture of ACh and VHH described above.

Modified “purely pre-perfusion” protocol: Oocytes were voltage clamped at -70mV and sampled at 2kHz. The flow was switched to apply VHH directly at the beginning of the sweep for 30s, with 30µM ACh alone applied for five seconds and finishing the sweep as noted above. The next sweep began directly after the termination of the current sweep.

“Co-perfusion” protocol: The flow of denoted concentrations of VHH mixed with 30µM ACh was applied 10s after the start of the sweep for a duration of 5s, followed by 15s of recorded wash.

“Post-perfusion” protocol: In order to properly switch solutions just after the on-set of desensitization there was not enough time to rinse solutions and therefore the main valve could not be used for switching. As a result, the solution was switched between 30µM ACh to 30µM ACh with the denoted concentration of VHH in the secondary valve where the delay of solution arrival is around 1.2s. Therefore, the main valve was switched to flow 30µM ACh 10s after the start of the sweep, with the secondary valve switching to a solution of 30µM ACh with VHH 0.5s later. This achieved the arrival of the VHH around 2s (including valve exchange time) after application of ACh alone. The combination was perfused for 6s before switching back to ACh alone, and the main valve was switched back to Ringer's after 3s effectively creating a 10s application of 30µM ACh which included a combination of ACh with VHH for 6s directly in the middle.

## List of Abbreviations

5-HT<sub>3A</sub>: 5-hydroxy tryptamine type 3 subunit A,  $\alpha$ -Btx:  $\alpha$ -Bungarotoxin, ACh: acetylcholine, Ago-PAM: positive allosteric modulator with agonist properties, BSA: bovine serum albumin, cDNA: complementary deoxyribonucleic acid, CDR: complementarity-determining region, cryo-EM: cryogenic electron microscopy, DMEM: Dulbecco's modified Eagle medium, DMSO: dimethyl-sulfoxide, ECD: extracellular domain, EDTA: ethylenediaminetetraacetic acid, ELIC: *Erwinia* ligand-gated ion channel, ELISA: enzyme-linked immunosorbent assay, FBS: fetal bovine serum, GABA:  $\gamma$ -aminobutyric acid, GFP: green fluorescent protein, h $\alpha$ 7-nAChR/m5-HT<sub>3A</sub>: human  $\alpha$ 7-nAChR/mouse 5-HT<sub>3A</sub>, HEK: Human embryonic kidney, HRP: horse radish peroxidase, ICD: intracellular domain, Ig: immunoglobulin, IRES: internal ribosome entry site, mRNA: messenger ribonucleic acid, nAChR: nicotinic acetylcholine receptor, NAM: negative allosteric modulator, OD: optical density, PAM: positive allosteric modulator, PBS: phosphate buffered saline, PBS-BSA: PBS with 1% BSA, PBST: PBS with Tween 20, PCR: polymerase chain reaction, PFA: paraformaldehyde, SAM: silent allosteric modulator, TCEP: tris(2-carboxyethyl) phosphine, TMD: transmembrane domain, VHH: variable domain on heavy chain.

## Statements Declarations

### *Funding*

The work and QL were supported by a grant from LanZhou Institute of Biological Products Co., Ltd, LanZhou, China (Institut Pasteur PPU program and doctoral school ED3C). The work was also supported by the Institut Pasteur "Programme transversal de recherche" (PTR 03-17 Nicobinder). ÁN received funding from the "Agence Nationale de la Recherche" (Grant ANR-17-CE11-0030, Nicofive), GDB received funding from the "Institut National du Cancer" INCa, MP and PJC received funding from the European Research Council (Grant #: 788974, Dynacotine), and finally SP and UM were supported by "Fondation pour la Recherche Médicale" FRM-Equipe, INCa, ERA-NET Neuron, and "Centre National de la Recherche Scientifique".

### *Competing interests*

QL, ÁN, GA, PJC, PL, MP, NB are inventors of patent application US 63/383,099 that covers the VHH and therapeutic uses thereof.

### *Authors' contributions*

QL: helped design and performed and analyzed biopanning, ELISA, VHH (excluding VHH-Fc constructs) engineering, expression, labeling, immunofluorescence, radioactivity, electrophysiology experiments and helped edit the manuscript.

ÁN: designed electrophysiological experiments and recording chamber, designed and constructed perfusion system, analyzed all data, wrote and edited the manuscript.

GA: designed and analyzed biopanning, ELISA, VHH expression and labeling and engineered VHHs; performed alpaca immunization and VHH expression and labeling; and edited manuscript.

MP: performed immunofluorescence experiments and helped edit the manuscript.

SP: designed and performed immunofluorescence experiments and helped edit the manuscript.

GDB: performed electrophysiological experiments involving C4-E3 competition.

NB: helped with radioactivity and immunofluorescence experiments.

RB: performed VHH-Fc expression and helped with immunofluorescence experiments.

UM: designed immunofluorescence experiments

PL: performed alpaca immunization and helped design biopanning, ELISA, VHH expression and labeling along with engineering VHHs; helped edit the manuscript.

PJC: conceived project, acquired funding, wrote and edited the manuscript

All authors read and approved the final manuscript

### *Data Availability*

The vast majority of the data generated or analyzed during this study are included in this published article and its supplementary information file. Any remaining data for the current study is available from the corresponding author(s) on reasonable request.

### *Ethics approval and consent to participate*

Not applicable

### *Consent to participate and Consent to publish*

Not applicable

## References

1. Nemezc Á, Prevost MS, Menny A, Corringer P-J (2016) Emerging Molecular Mechanisms of Signal Transduction in Pentameric Ligand-Gated Ion Channels. *Neuron* 90:452–470. <https://doi.org/10.1016/j.neuron.2016.03.032>
2. Bouzat C, Lasala M, Nielsen BE, et al (2018) Molecular function of  $\alpha 7$  nicotinic receptors as drug targets:  $\alpha 7$  nicotinic receptor. *J Physiol* 596:1847–1861. <https://doi.org/10.1113/JP275101>
3. Papke RL, Horenstein NA (2021) Therapeutic Targeting of  $\alpha 7$  Nicotinic Acetylcholine Receptors. *Pharmacol Rev* 73:1118–1149. <https://doi.org/10.1124/pharmrev.120.000097>
4. Terry AV, Callahan PM (2020)  $\alpha 7$  nicotinic acetylcholine receptors as therapeutic targets in schizophrenia: Update on animal and clinical studies and strategies for the future. *Neuropharmacology* 170:108053. <https://doi.org/10.1016/j.neuropharm.2020.108053>
5. Wang H, Yu M, Ochani M, et al (2003) Nicotinic acetylcholine receptor  $\alpha 7$  subunit is an essential regulator of inflammation. *Nature* 421:384–388. <https://doi.org/10.1038/nature01339>
6. Wu J, Liu Q, Tang P, et al (2016) Heteromeric  $\alpha 7\beta 2$  Nicotinic Acetylcholine Receptors in the Brain. *Trends Pharmacol Sci* 37:562–574. <https://doi.org/10.1016/j.tips.2016.03.005>
7. Lasala M, Corradi J, Bruzzone A, et al (2018) A human-specific, truncated  $\alpha 7$  nicotinic receptor subunit assembles with full-length  $\alpha 7$  and forms functional receptors with different stoichiometries. *J Biol Chem* 293:10707–10717. <https://doi.org/10.1074/jbc.RA117.001698>
8. Noviello CM, Gharpure A, Mukhtasimova N, et al (2021) Structure and gating mechanism of the  $\alpha 7$  nicotinic acetylcholine receptor. *Cell* 184:2121–2134.e13. <https://doi.org/10.1016/j.cell.2021.02.049>
9. Zhao Y, Liu S, Zhou Y, et al (2021) Structural basis of human  $\alpha 7$  nicotinic acetylcholine receptor activation. *Cell Res* 31:713–716. <https://doi.org/10.1038/s41422-021-00509-6>
10. Galzi JL, Bertrand S, Corringer PJ, et al (1996) Identification of calcium binding sites that regulate potentiation of a neuronal nicotinic acetylcholine receptor. *EMBO J* 15:5824–5832. <https://doi.org/10.1002/j.1460-2075.1996.tb00969.x>
11. Natarajan K, Mukhtasimova N, Corradi J, et al (2020) Mechanism of calcium potentiation of the  $\alpha 7$  nicotinic acetylcholine receptor. *J Gen Physiol* 152:e202012606. <https://doi.org/10.1085/jgp.202012606>
12. Le Novère N, Grutter T, Changeux J-P (2002) Models of the extracellular domain of the nicotinic receptors and of agonist- and  $\text{Ca}^{2+}$ -binding sites. *Proc Natl Acad Sci* 99:3210–3215. <https://doi.org/10.1073/pnas.042699699>
13. Krause RM, Buisson B, Bertrand S, et al (1998) Ivermectin: A Positive Allosteric Effector of the  $\alpha 7$  Neuronal Nicotinic Acetylcholine Receptor. *Mol Pharmacol* 53:283–294. <https://doi.org/10.1124/mol.53.2.283>
14. Hurst RS (2005) A Novel Positive Allosteric Modulator of the  $\alpha 7$  Neuronal Nicotinic Acetylcholine Receptor: In Vitro and In Vivo Characterization. *J Neurosci* 25:4396–4405. <https://doi.org/10.1523/JNEUROSCI.5269-04.2005>
15. Gill JK, Savolainen M, Young GT, et al (2011) Agonist activation of  $\alpha 7$  nicotinic acetylcholine receptors via an allosteric transmembrane site. *Proc Natl Acad Sci* 108:5867–5872. <https://doi.org/10.1073/pnas.1017975108>
16. Delbart F, Brams M, Gruss F, et al (2018) An allosteric binding site of the  $\alpha 7$  nicotinic acetylcholine receptor revealed in a humanized acetylcholine-binding protein. *J Biol Chem* 293:2534–2545. <https://doi.org/10.1074/jbc.M117.815316>
17. Spurny R, Debaveye S, Farinha A, et al (2015) Molecular blueprint of allosteric binding sites in a homologue of the agonist-binding domain of the  $\alpha 7$  nicotinic acetylcholine receptor. *Proc Natl Acad Sci U S A* 112:E2543–52. <https://doi.org/10.1073/pnas.1418289112>
18. Jovčevska I, Muyldermans S (2020) The Therapeutic Potential of Nanobodies. *BioDrugs* 34:11–26. <https://doi.org/10.1007/s40259-019-00392-z>
19. Uchański T, Pardon E, Steyaert J (2020) Nanobodies to study protein conformational states. *Curr Opin Struct Biol* 60:117–123. <https://doi.org/10.1016/j.sbi.2020.01.003>
20. Hassaine G, Deluz C, Grasso L, et al (2014) X-ray structure of the mouse serotonin 5-HT<sub>3</sub> receptor. *Nature* 512:276–281. <https://doi.org/10.1038/nature13552>
21. Masiulis S, Desai R, Uchański T, et al (2019) GABAA receptor signalling mechanisms revealed by structural pharmacology. *Nature* 565:454–459. <https://doi.org/10.1038/s41586-018-0832-5>
22. Brams M, Govaerts C, Kambara K, et al (2020) Modulation of the *Erwinia* ligand-gated ion channel (ELIC) and the 5-HT<sub>3</sub> receptor via a common vestibule site. *eLife* 9:e51511. <https://doi.org/10.7554/eLife.51511>
23. Corringer P-J, Galzi J-L, Eiselé J-L, et al (1995) Identification of a New Component of the Agonist Binding Site of the Nicotinic  $\alpha 7$  Homooligomeric Receptor. *J Biol Chem* 270:11749–11752. <https://doi.org/10.1074/jbc.270.20.11749>

24. Craig PJ, Bose S, Zwart R, et al (2004) Stable expression and characterisation of a human  $\alpha 7$  nicotinic subunit chimera: a tool for functional high-throughput screening. *Eur J Pharmacol* 502:31–40. <https://doi.org/10.1016/j.ejphar.2004.08.042>
25. Scholler P, Nevoltris D, de Bundel D, et al (2017) Allosteric nanobodies uncover a role of hippocampal mGlu2 receptor homodimers in contextual fear consolidation. *Nat Commun* 8:1967. <https://doi.org/10.1038/s41467-017-01489-1>
26. Papke RL, Porter Papke JK (2002) Comparative pharmacology of rat and human  $\alpha 7$  nAChR conducted with net charge analysis: Pharmacology of rat and human  $\alpha 7$  nAChR. *Br J Pharmacol* 137:49–61. <https://doi.org/10.1038/sj.bjp.0704833>
27. Buchman AL, Awal M, Jenden D, et al (2000) The Effect of Lecithin Supplementation on Plasma Choline Concentrations During a Marathon. *J Am Coll Nutr* 19:768–770. <https://doi.org/10.1080/07315724.2000.10718076>
28. Miller PS, Scott S, Masiulis S, et al (2017) Structural basis for GABAA receptor potentiation by neurosteroids. *Nat Struct Mol Biol* 24:986–992. <https://doi.org/10.1038/nsmb.3484>
29. Laverty D, Desai R, Uchański T, et al (2019) Cryo-EM structure of the human  $\alpha 1\beta 3\gamma 2$  GABA A receptor in a lipid bilayer. *Nature* 565:516–520. <https://doi.org/10.1038/s41586-018-0833-4>
30. Walsh RM, Roh S-H, Gharpure A, et al (2018) Structural principles of distinct assemblies of the human  $\alpha 4\beta 2$  nicotinic receptor. *Nature* 557:261–265. <https://doi.org/10.1038/s41586-018-0081-7>
31. Zhu S, Noviello CM, Teng J, et al (2018) Structure of a human synaptic GABAA receptor. *Nature* 559:67–72. <https://doi.org/10.1038/s41586-018-0255-3>
32. Gharpure A, Teng J, Zhuang Y, et al (2019) Agonist Selectivity and Ion Permeation in the  $\alpha 3\beta 4$  Ganglionic Nicotinic Receptor. *Neuron* 2019:030. <https://doi.org/10.1016/j.neuron.2019.07.030>
33. Hultberg A, Temperton NJ, Rosseels V, et al (2011) Llama-Derived Single Domain Antibodies to Build Multivalent, Superpotent and Broadened Neutralizing Anti-Viral Molecules. *PLOS ONE* 6:e17665. <https://doi.org/10.1371/journal.pone.0017665>
34. Terryn S, Francart A, Lamoral S, et al (2014) Protective Effect of Different Anti-Rabies Virus VHH Constructs against Rabies Disease in Mice. *PLOS ONE* 9:e109367. <https://doi.org/10.1371/journal.pone.0109367>
35. Dong J, Huang B, Wang B, et al (2020) Development of humanized tri-specific nanobodies with potent neutralization for SARS-CoV-2. *Sci Rep* 10:17806. <https://doi.org/10.1038/s41598-020-74761-y>
36. Schoof M, Faust B, Saunders RA, et al (2020) An ultrapotent synthetic nanobody neutralizes SARS-CoV-2 by stabilizing inactive Spike. *Science* 370:1473–1479. <https://doi.org/10.1126/science.abe3255>
37. Chandley MJ, Miller MN, Kwasigroch CN, et al (2009) Increased antibodies for the  $\alpha 7$  subunit of the nicotinic receptor in schizophrenia. *Schizophr Res* 109:98–101. <https://doi.org/10.1016/j.schres.2009.01.023>
38. Gransagne M, Aymé G, Brier S, et al (2022) Development of a highly specific and sensitive VHH-based sandwich immunoassay for the detection of the SARS-CoV-2 nucleoprotein. *J Biol Chem* 298:101290. <https://doi.org/10.1016/j.jbc.2021.101290>
39. Nashmi R, Dickinson ME, McKinney S, et al (2003) Assembly of alpha4beta2 nicotinic acetylcholine receptors assessed with functional fluorescently labeled subunits: effects of localization, trafficking, and nicotine-induced upregulation in clonal mammalian cells and in cultured midbrain neurons. *J Neurosci* 23:11554–67. <https://doi.org/10.1523/JNEUROSCI.23-37-11554.2003>
40. Gu S, Matta JA, Lord B, et al (2016) Brain  $\alpha 7$  Nicotinic Acetylcholine Receptor Assembly Requires NACHO. *Neuron* 89:948–955. <https://doi.org/10.1016/j.neuron.2016.01.018>
41. Maskos U, Molles BE, Pons S, et al (2005) Nicotine reinforcement and cognition restored by targeted expression of nicotinic receptors. *Nature* 436:103–7. <https://doi.org/10.1038/nature03694>
42. Conrath KE, Lauwereys M, Galleni M, et al (2001) Beta-lactamase inhibitors derived from single-domain antibody fragments elicited in the camelidae. *Antimicrob Agents Chemother* 45:2807–2812. <https://doi.org/10.1128/AAC.45.10.2807-2812.2001>
43. Vandesquille M, Li T, Po C, et al (2017) Chemically-defined camelid antibody bioconjugate for the magnetic resonance imaging of Alzheimer’s disease. *mAbs* 9:1016–1027. <https://doi.org/10.1080/19420862.2017.1342914>
44. Li T, Vandesquille M, Koukouli F, et al (2016) Camelid single-domain antibodies: A versatile tool for in vivo imaging of extracellular and intracellular brain targets. *J Controlled Release* 243:1–10. <https://doi.org/10.1016/j.jconrel.2016.09.019>

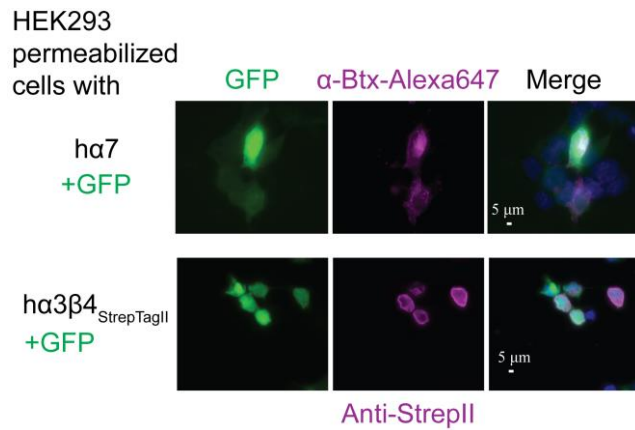

**Supplementary Fig 1** Immunofluorescence expression controls

Representative (of n=4) images of permeabilized HEK 293 cells expressing  $\alpha 7$ - (top) and  $\alpha 3\beta 4$ <sub>StrepII</sub>- (bottom) nAChRs immunostained using conjugated  $\alpha$ -Btx-Alexa647 and an anti-StrepII tag detected by a conjugated anti-mouse IgG-Alexa647 respectively. Dapi, shown in blue, stains the cells' nucleus; Alex647, a red wavelength, is colored as magenta. Cytoplasmic eGFP indicates efficiently transfected cells. Identical exposure times were used to visualize each channel on all conditions.
